# Supplementary material for: Nitrogen-doped carbon and iron carbide nanocomposites as cost-effective counter electrodes of dye-sensitized solar cells
Source: Royal Society of Chemistry journal article supplement (doi:10.1039/c3ta14429a), 2014-01-01
Supplement: c3ta14429a.pdf [file c3ta14429a.pdf]

## Nitrogen-doped carbon and iron carbide nanocomposites as cost-effective counter electrodes of dye-sensitized solar cells

Hongxia Xu,<sup>‡<sup>a</sup></sup> Chuanjian Zhang,<sup>‡<sup>a</sup></sup> Zaiwei Wang,<sup>ab</sup> Shuping Pang,<sup>a</sup> Xinhong Zhou,<sup>\*c</sup>

Zhongyi Zhang,<sup>a</sup> Guanglei Cui<sup>\*a</sup>

<sup>a</sup>The Qingdao Key Lab of solar energy utilization and energy storage technology,  
Qingdao Institute of Bioenergy and Bioprocess Technology, Chinese Academy of  
Sciences, Qingdao 266101, P. R. China

<sup>b</sup>University of Chinese Academy of Sciences, Beijing, 100049, P. R. China

<sup>c</sup>Qingdao University of Science and Technology, Qingdao, 266101, P. R. China

<sup>‡</sup> These authors contributed equally to this work.

\* Corresponding author. E-mail: cuigl@qibebt.ac.cn

### SUPPORTING INFORMATION

#### Table of Contents

|                                                                                                                                                |    |
|------------------------------------------------------------------------------------------------------------------------------------------------|----|
| XRD patterns of Fe <sub>3</sub> C@N-C nanocomposites with different FeC <sub>2</sub> O <sub>4</sub> /CH <sub>2</sub> N <sub>2</sub> ratio..... | S2 |
| Element analysis results of Fe <sub>3</sub> C@N-C with different R value.....                                                                  | S2 |
| SEM and TEM images of FeC <sub>2</sub> O <sub>4</sub> .....                                                                                    | S2 |
| TEM images of Fe <sub>3</sub> C@N-C-1 and Fe <sub>3</sub> C@N-C-4.....                                                                         | S3 |
| Elemental mapping of Fe <sub>3</sub> C@N-C nanocomposites.....                                                                                 | S3 |
| Raman spectra of Fe <sub>3</sub> C@N-C-1, Fe <sub>3</sub> C@N-C-2.5.....                                                                       | S4 |
| Consecutive 100 cyclic voltammograms for the Fe <sub>3</sub> C@N-C-2.5 CE.....                                                                 | S4 |
| Equivalent circuits for the symmetric cells consisted of platinum and Fe <sub>3</sub> C@N-C electrodes .....                                   | S4 |
| SEM images of nearly pure N-C and non-1D configuration Fe <sub>3</sub> C@N-C-2.5.....                                                          | S5 |
| Characteristics of the <i>J-V</i> curves of the DSSCs fabricated using nearly pure N-C and non-1D configuration Fe <sub>3</sub> C@N-C-2.5..... | S5 |

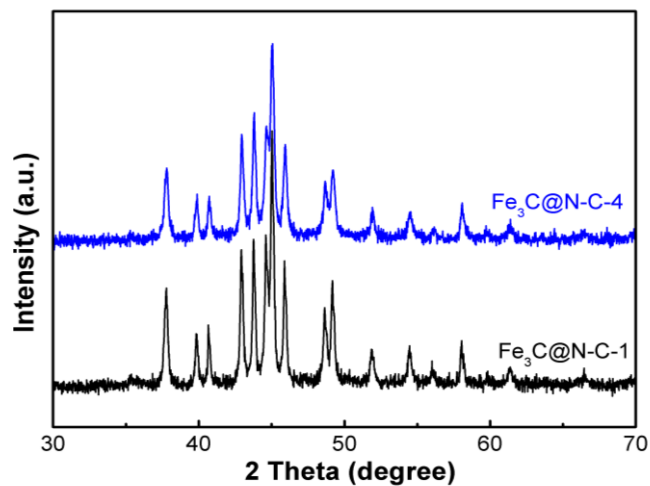

Fig. S1 XRD patterns of Fe<sub>3</sub>C@N-C nanocomposites with different FeC<sub>2</sub>O<sub>4</sub>/NH<sub>2</sub>CN ratio.

Table S1 Element analysis results of Fe<sub>3</sub>C@N-C with different FeC<sub>2</sub>O<sub>4</sub>/NH<sub>2</sub>CN ratio.

| Sample                    | Fe <sub>3</sub> C/wt% | C/wt% | N/wt% |
|---------------------------|-----------------------|-------|-------|
| Fe <sub>3</sub> C@N-C-1   | 77.66                 | 20.78 | 1.56  |
| Fe <sub>3</sub> C@N-C-2.5 | 87.49                 | 11.98 | 0.53  |
| Fe <sub>3</sub> C@N-C-4   | 90.34                 | 9.55  | 0.11  |

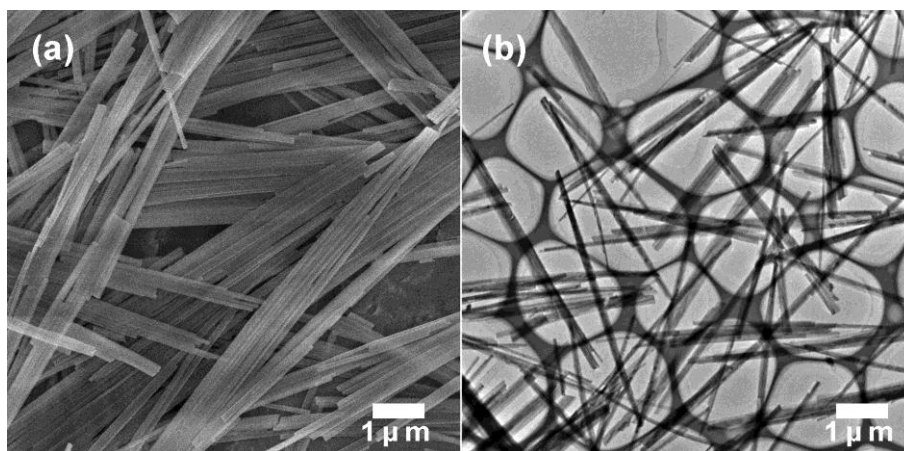

Fig. S2 SEM and TEM images of FeC<sub>2</sub>O<sub>4</sub> nanowires.

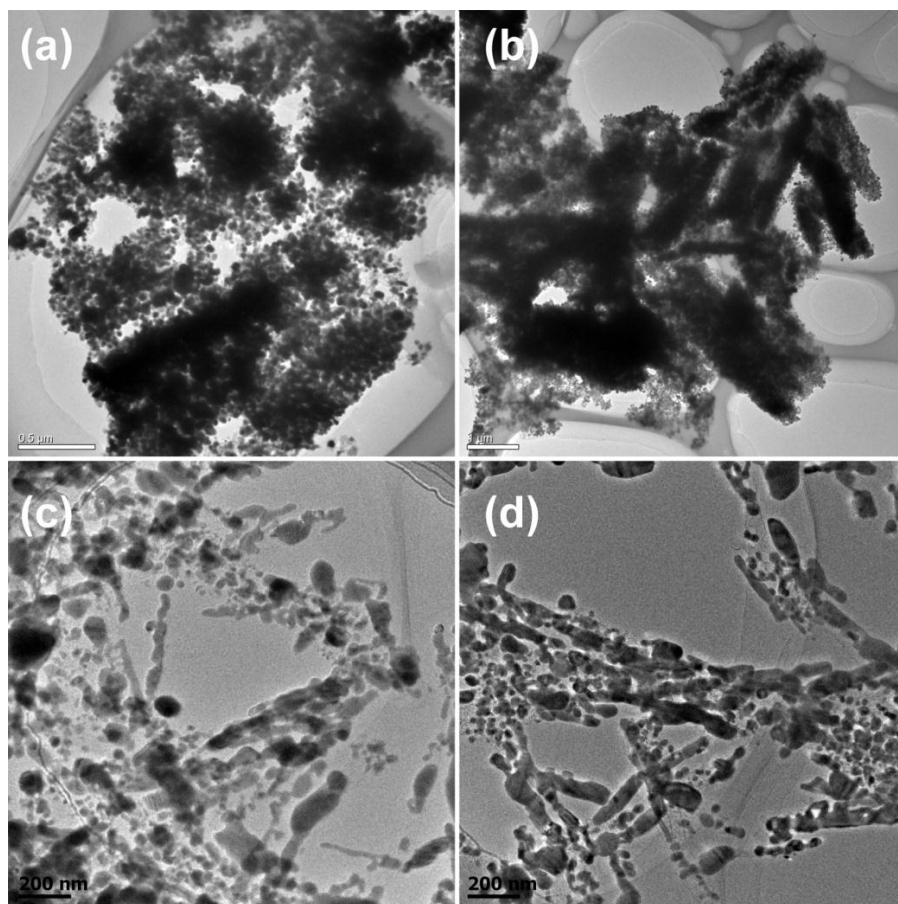

Fig. S3 TEM images of Fe<sub>3</sub>C synthesized by different FeC<sub>2</sub>O<sub>4</sub>/ NH<sub>2</sub>CN ratio

(a) and (b) R=1, (c) and (d) R=4.

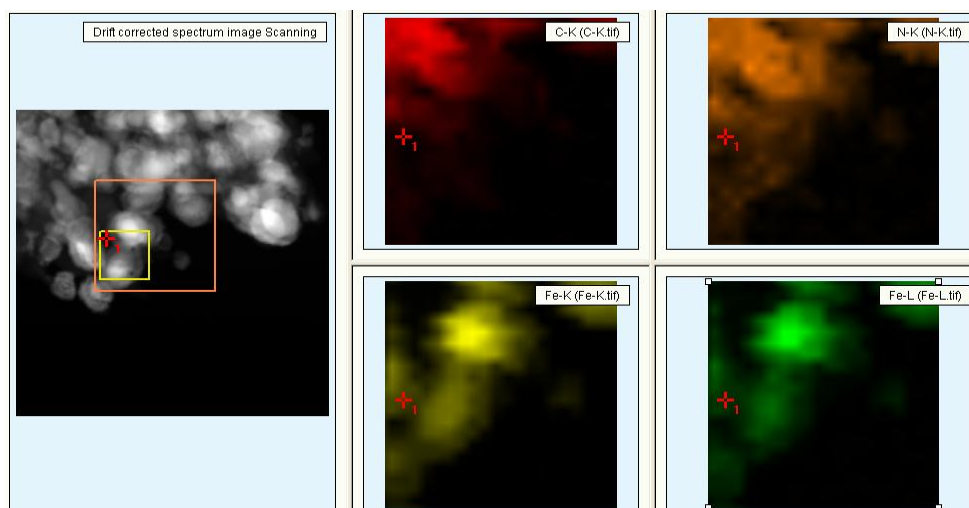

Fig. S4 Elemental mapping of Fe<sub>3</sub>C@N-C nanocomposites

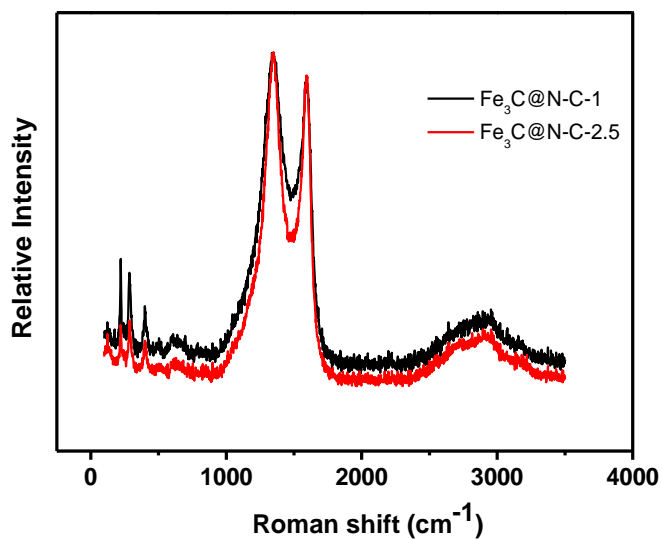

Fig. S5 Raman spectra of  $\text{Fe}_3\text{C@N-C}$

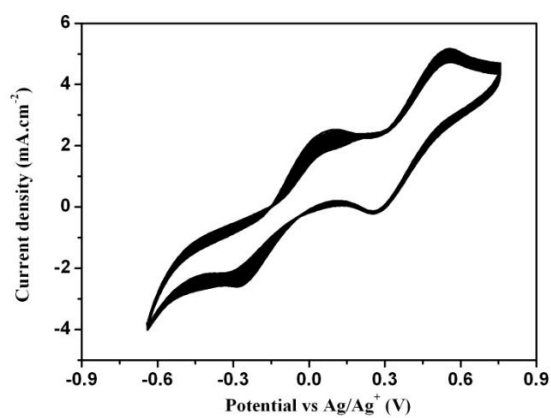

Fig. S6 Consecutive 100 cyclic voltammograms for the  $\text{Fe}_3\text{C@N-C-2.5}$  CE at a scan rate of 20  $\text{mV}\cdot\text{s}^{-1}$

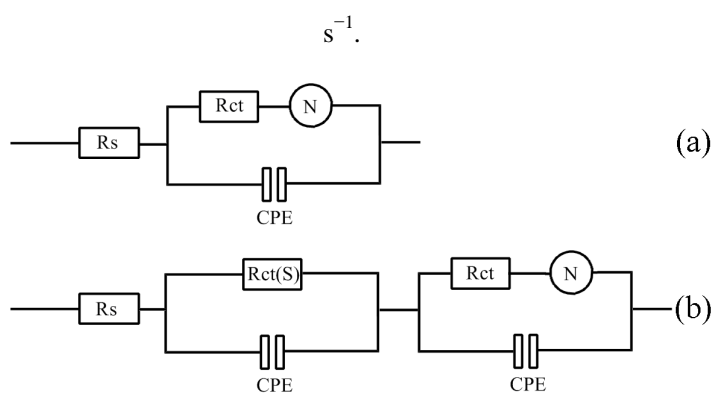

Fig. S7 equivalent circuits for the symmetric cells consisted of platinum electrodes (a)  $\text{Fe}_3\text{C@N-C}$  (b)

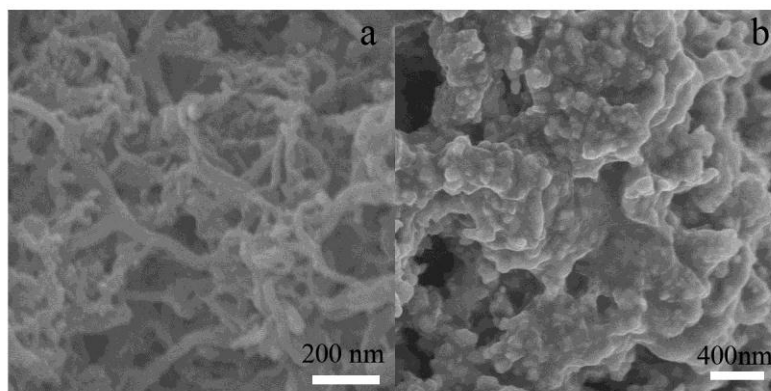

Fig. S8 SEM images of nearly pure N-C (a) and non-1D configuration  $\text{Fe}_3\text{C@N-C-2.5}$  (b)

Table S2 Characteristics of the  $J$ - $V$  curves of the DSSCs fabricated using nearly pure N-C and non-1D configuration  $\text{Fe}_3\text{C@N-C-2.5}$

| Counter Electrode                                  | $J_{sc}$ (mA/cm <sup>2</sup> ) | $V_{oc}$ (mV) | FF(%) | $\eta$ (%)      |
|----------------------------------------------------|--------------------------------|---------------|-------|-----------------|
| nearly pure N-C                                    | 14.66                          | 741           | 58.70 | $6.38 \pm 0.01$ |
| non-1D configuration $\text{Fe}_3\text{C@N-C-2.5}$ | 14.05                          | 740           | 63.03 | $6.55 \pm 0.02$ |
